# Supplementary material
Source: MDPI journal article supplement (https://www.mdpi.com/1424-8247/11/2/45)
Supplement: s1 [file s1]

Table S1. Results of physiological, biochemical, *Pectobacterium* genus (*pel* gene) specific and *Pectobacterium atrosepticum* and *Pectobacterium carotovorum* subsp. *carotovorum* species specific PCRs and MALDI-TOF mass spectrometry on isolates obtained from potato stem samples symptomatic for blackleg from farms in Co. Cork, Ireland.

| Isolate      | Isolation source                           | Cavity formation on CVP medium (25 °C, 48 hrs) | Growth on NA at 37°C, 48 hrs | Production of reducing substance from sucrose | Acid production of reducing substance from sucrose | PCR - <i>Pel</i> gene (Darasse et al 1994) | PCR - <i>P. atrosepticum</i> (De Boer & Ward 1995) | PCR - <i>P. carotovorum</i> subsp. <i>carotovorum</i> (Kang et al 2003) | MALD-TOF MS | Identity |
|--------------|--------------------------------------------|------------------------------------------------|------------------------------|-----------------------------------------------|----------------------------------------------------|--------------------------------------------|----------------------------------------------------|-------------------------------------------------------------------------|-------------|----------|
| CB BL1-1     | <i>Solanum tuberosum</i> cv. British Queen | +                                              | -                            | +                                             | +                                                  | +                                          | +                                                  | NA                                                                      | Pa          | Pa       |
| CB BL2-1     | <i>Solanum tuberosum</i> cv. British Queen | +                                              | -                            | +                                             | +                                                  | +                                          | +                                                  | NA                                                                      | Pa          | Pa       |
| CB BL3-1     | <i>Solanum tuberosum</i> cv. British Queen | +                                              | -                            | +                                             | +                                                  | +                                          | +                                                  | NA                                                                      | Pa          | Pa       |
| CB BL4-1     | <i>Solanum tuberosum</i> cv. British Queen | +                                              | -                            | +                                             | +                                                  | +                                          | +                                                  | NA                                                                      | Pa          | Pa       |
| CB BL5-1     | <i>Solanum tuberosum</i> cv. British Queen | +                                              | -                            | +                                             | +                                                  | +                                          | +                                                  | NA                                                                      | Pa          | Pa       |
| CB BL7-1     | <i>Solanum tuberosum</i> cv. Golden wonder | +                                              | -                            | +                                             | +                                                  | +                                          | +                                                  | NA                                                                      | Pa          | Pa       |
| CB BL9-1     | <i>Solanum tuberosum</i> cv. Golden wonder | +                                              | -                            | +                                             | +                                                  | +                                          | +                                                  | NA                                                                      | Pa          | Pa       |
| CB BL11-1    | <i>Solanum tuberosum</i> cv. Rooster       | +                                              | -                            | +                                             | +                                                  | +                                          | +                                                  | NA                                                                      | Pa          | Pa       |
| CB BL12-2    | <i>Solanum tuberosum</i> cv. Golden wonder | +                                              | -                            | +                                             | +                                                  | +                                          | +                                                  | NA                                                                      | Pa          | Pa       |
| CB BL13-1    | <i>Solanum tuberosum</i> cv. Golden wonder | +                                              | -                            | +                                             | +                                                  | +                                          | +                                                  | NA                                                                      | Pa          | Pa       |
| CB BL14-1    | <i>Solanum tuberosum</i> cv. Golden wonder | +                                              | -                            | +                                             | +                                                  | +                                          | +                                                  | NA                                                                      | Pa          | Pa       |
| CB BL15-1    | <i>Solanum tuberosum</i> cv. Golden wonder | +                                              | -                            | +                                             | +                                                  | +                                          | +                                                  | NA                                                                      | Pa          | Pa       |
| CB BL16-1    | <i>Solanum tuberosum</i> cv. Golden wonder | +                                              | -                            | +                                             | +                                                  | +                                          | +                                                  | NA                                                                      | Pa          | Pa       |
| CB BL18-1    | <i>Solanum tuberosum</i> cv. Golden wonder | +                                              | -                            | +                                             | +                                                  | +                                          | +                                                  | NA                                                                      | Pa          | Pa       |
| CB BL19-1    | <i>Solanum tuberosum</i> cv. Golden wonder | +                                              | -                            | +                                             | +                                                  | +                                          | +                                                  | NA                                                                      | Pa          | Pa       |
| CB BL19-1-37 | <i>Solanum tuberosum</i> cv. Golden wonder | +                                              | +                            | -                                             | -                                                  | +                                          | -                                                  | +                                                                       | NA          | Pcc      |

Results recorded as +, positive; -, negative; NA, not available; Pa, *P. atrosepticum*; Pcc, *P. carotovorum* subsp. *carotovorum*

(A)

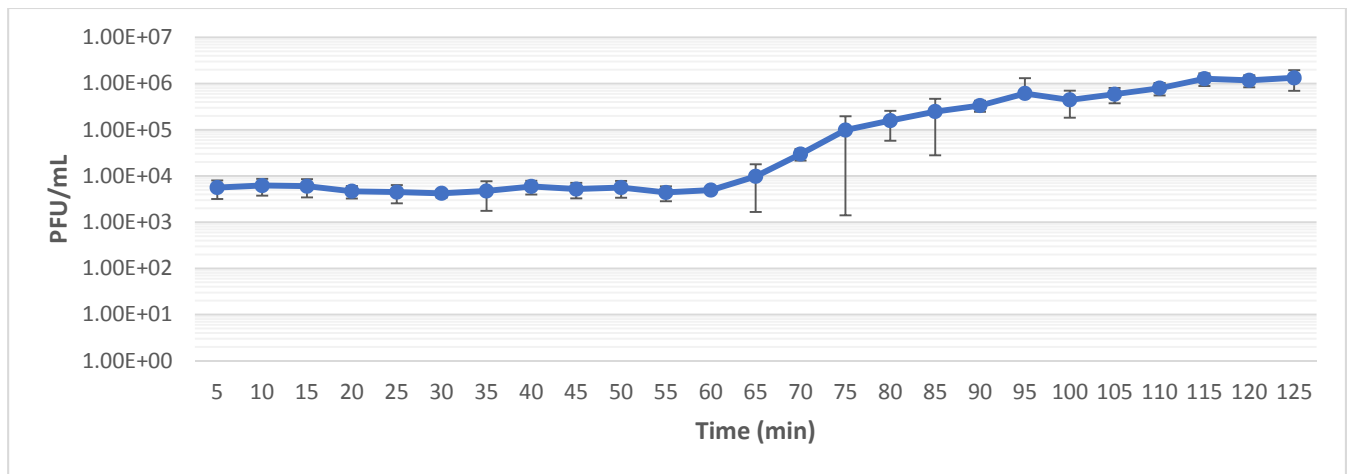

(B)

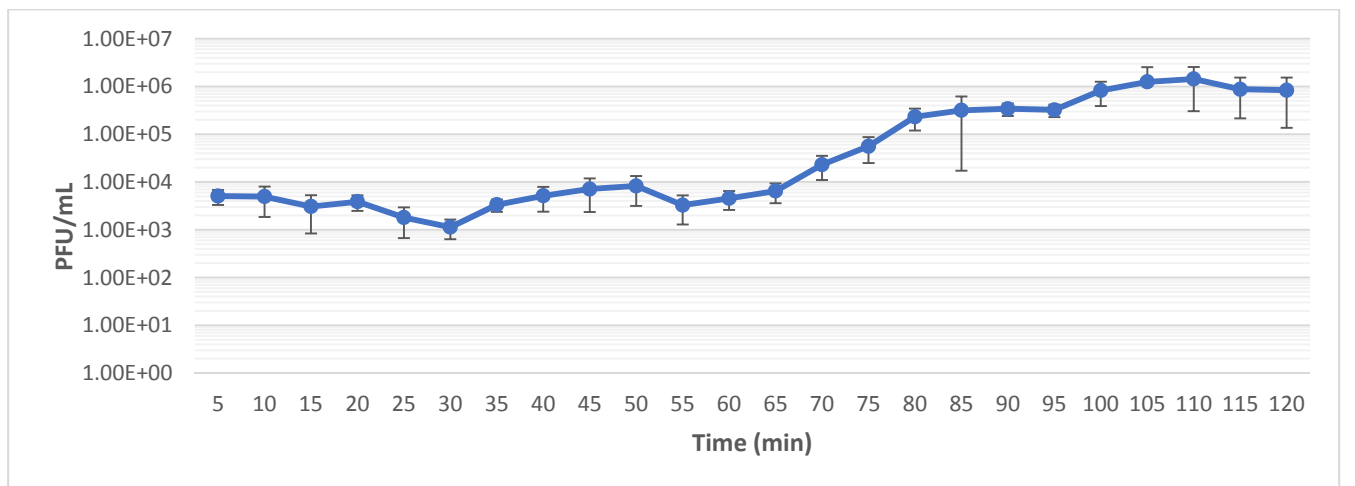

(C)

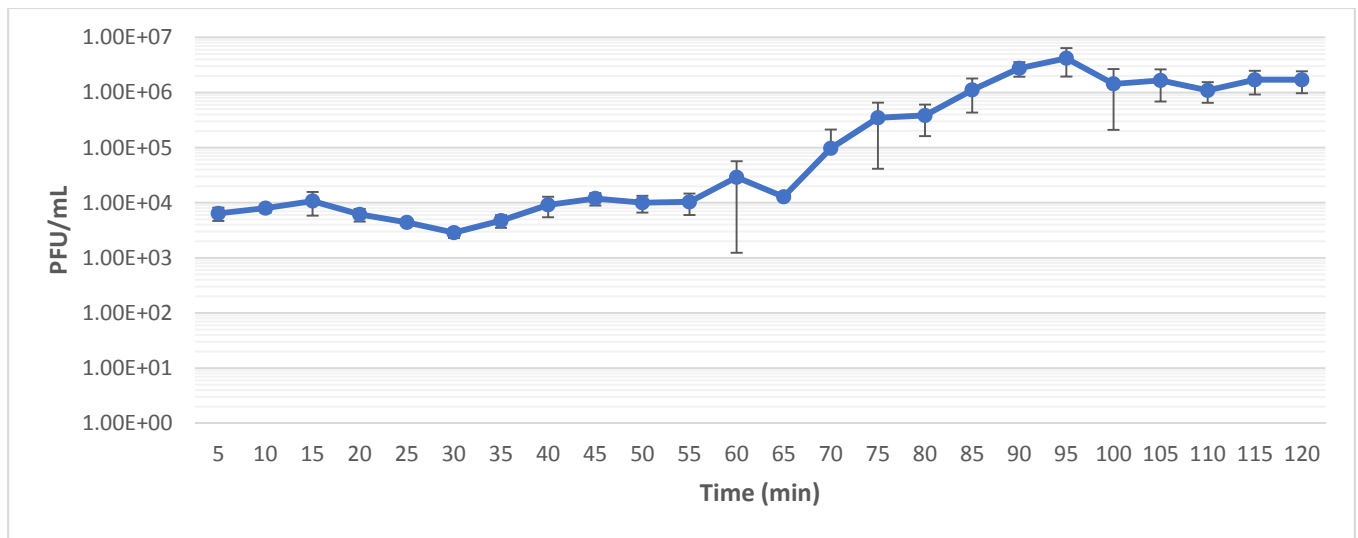

Figure S1. Single step growth curve growth analysis of phage CB1 infection of *P. atrosepticum* strain DSM18077 (A), phage CB3 infection of *P. atrosepticum* strain DSM30186 (B) and phage CB4 infection of *P. atrosepticum* DSM30186 (C). Each assay was independently repeated in triplicate and the results were averaged.

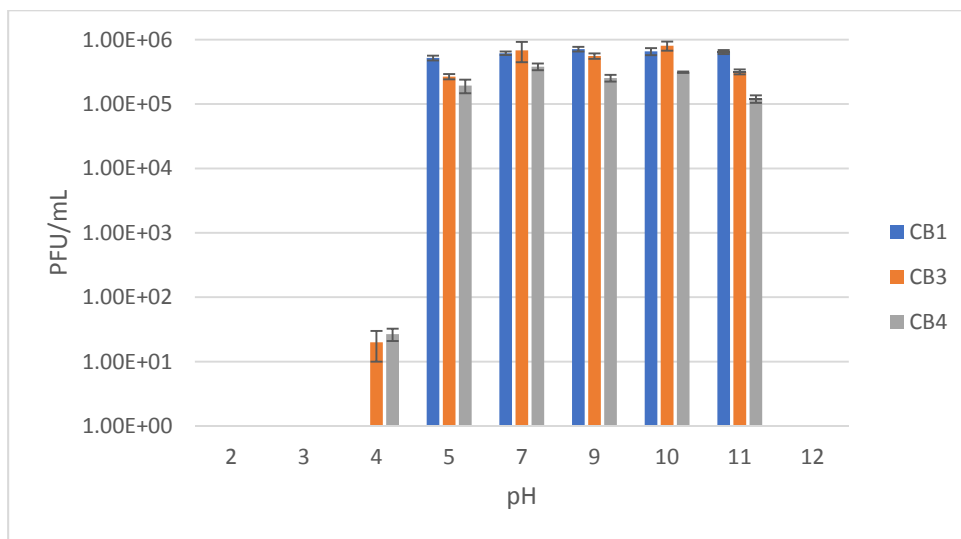

Figure S2. Stability of *Pectobacterium* phages CB1, CB3 and CB4 to various pH values upon 24 hours of exposure. Error bars represent standard deviation of biological repeats (n=3).

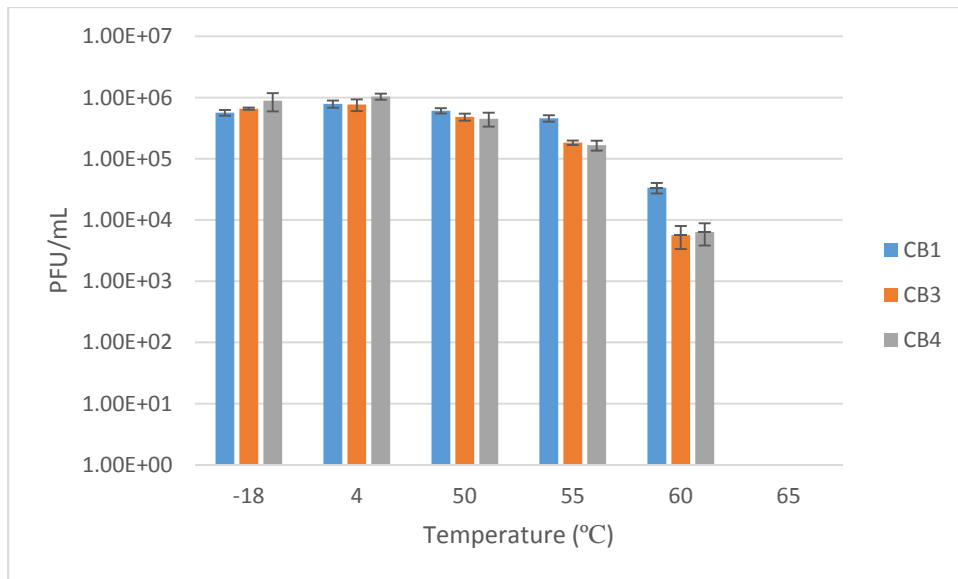

Figure S3. Stability of *Pectobacterium* phages CB1, CB3 and CB4 to various temperatures upon one-hour exposures. Error bars represent standard deviation of biological repeats (n=3).

Table S2. Identified ORFs and tRNA gene variations between the genomes of *Pectobacterium* phages CB1, CB3 and CB4. With genome comparisons made using BLASTN with ACTs. Colour coded: Green (shared feature), Yellow (unique feature to phage in question).

| CB1                           | CB3                           | CB4                            | Variation discription                              |
|-------------------------------|-------------------------------|--------------------------------|----------------------------------------------------|
| CB1_4 (hypothetical)          |                               |                                | CB1_4 has no homolog in CB3 + CB4                  |
| CB1_8 (hypothetical)          |                               |                                | CB1_8 has no homolog in CB3 + CB4                  |
| CB1_10 (hypothetical)         | CB3_9 (hypothetical)          | CB4_9 (hypothetical)           | ORFs of CB1 are not share with CB3 + CB4           |
| CB1_11 (hypothetical)         | CB3_10 (hypothetical)         | CB4_10 (hypothetical)          |                                                    |
|                               | CB3_11 (hypothetical)         | CB4_11 (hypothetical)          |                                                    |
|                               | CB3_17 (hypothetical)         | CB4_17 (hypothetical)          | CB3/CB4_17 homolog not present in CB1              |
| CB1_21 (hypothetical)         | CB3_22 (hypothetical)         | CB4_22 (hypothetical)          | ORF of CB1 are not shared with CB3 + CB4           |
|                               | CB3_23 (hypothetical)         | CB4_23 (hypothetical)          |                                                    |
| CB1_24 (HNH)                  | CB3_26 (hypothetical)         | CB4_26 (hypothetical)          | ORFs of CB1 are not shared with CB3 + CB4          |
|                               | CB3_27 (hypothetical)         | CB4_27 (hypothetical)          |                                                    |
| CB1_26 (hypothetical)         | CB3_29 (hypothetical)         | CB4_29 (hypothetical)          | ORF of CB1 different in part to CB3 + CB4          |
| CB1_39 (HNH)                  |                               |                                | CB1 has no homolog in CB3 + CB4                    |
| CB1_42 (N4 gp32 like)         | CB3_45 (N4 gp32 like)         | CB4_44 (N4 gp32 like)          | N4 gp32-like gene of CB3 different to CB1+CB4      |
| CB1_45 (rIIB)                 | CB3_49 (rIIB)                 | ORF48 (rIIB)                   | Difference of CB1 ORF length compared to CB3 + CB4 |
| CB1_61 (tail spike)           | CB3_66 (tail spike)           | CB4_64, 65 (tail spike)        | CB4 homolog split into two ORFs                    |
| CB1_63 (thymidylate synthase) | CB3_68 (thymidylate synthase) | ORF67 (thymidylate synthase)   | ORF of CB1 and CB3 different to CB4                |
|                               |                               | 2 tRNA genes (tRNA1 and tRNA2) | CB4 possess tRNA genes not present in CB1 + CB3    |

Table S3. Homologs of the eighteen core proteins described by Li et al. 2016 found present in the genomes of *Pectobacterium* phages CB1, CB3 and CB4.

| No. | N4-like Core genes     | CB1 homolog | CB3 homolog | CB4 homolog |
|-----|------------------------|-------------|-------------|-------------|
| 1   | RNA P1                 | CB1_22      | CB3_24      | CB4_24      |
| 2   | RNA P2                 | CB1_23      | CB3_25      | CB4_25      |
| 3   | gp24 N4                | CB1_35      | CB3_38      | CB4_38      |
| 4   | gp25 N4                | CB1_38      | CB3_41      | CB4_41      |
| 5   | DNA P/ gp39 N4         | CB1_46      | CB3_50      | CB4_49      |
| 6   | gp42 N4                | CB1_66      | CB3_71      | CB4_70      |
| 7   | DNA primase            | CB1_67      | CB3_72      | CB4_71      |
| 8   | gp44 N4                | CB1_70      | CB3_75      | CB4_74      |
| 9   | SSB/gp45 N4            | CB1_72      | CB3_77      | CB4_76      |
| 10  | vRNAP                  | CB1_77      | CB3_82      | CB4_81      |
| 11  | gp53 N4                | CB1_80      | CB3_85      | CB4_84      |
| 12  | gp54 N4                | CB1_81      | CB3_86      | CB4_85      |
| 13  | gp55 N4                | CB1_82      | CB3_87      | CB4_86      |
| 14  | MCP/ gp56 N4           | CB1_83      | CB3_88      | CB4_87      |
| 15  | gp57 N4                | CB1_84      | CB3_89      | CB4_88      |
| 16  | 94kDa protein/ gp59 N4 | CB1_86      | CB3_91      | CB4_90      |
| 17  | terminase A            | CB1_91      | CB3_97      | CB4_95      |
| 18  | gp69                   | CB1_93      | CB3_99      | CB4_97      |

Table S4. Putative single-stranded hairpin promoters predicted in the genomes of *Pectobacterium* phages CB1, CB3 and CB4 identified assisted with QuikFold.

| Phage | Promotor | Coordinates    | Sequence                                |
|-------|----------|----------------|-----------------------------------------|
| CB1   | Porf1_1  | 76 - 105 bp    | GTGTTGA <u>ACCGGTATCCGGT</u> ACAGTACCGT |
|       | Porf1_2  | 823 - 852 bp   | ATGGCAT <u>CCATGCATCATGGC</u> ATCCATATG |
|       | Porf1_5  | 2085 - 2114 bp | TTGGACCGAGCGTAT <u>CGCTCAGCCC</u> ACTTA |
| CB3   | Porf3_1  | 130 - 159 bp   | GTGTTGA <u>ACCGGTATCCGGT</u> ACAGTACCGT |
|       | Porf3_2  | 919 - 948 bp   | ATGGCAT <u>CCATGCATCATGGC</u> ATCCATATG |
|       | Porf3_4  | 1850 - 1879 bp | TCGGACCG <u>CACGTATCGTGC</u> AGCCCCTTA  |
| CB4   | Porf4_1  | 76 - 105 bp    | GTGTTGA <u>ACCGGTATCCGGT</u> ACAGTACCGT |
|       | Porf4_2  | 866 - 895 bp   | ATGGCAT <u>CCATGCATCATGGC</u> ATCCATATG |
|       | Porf4_4  | 1797 - 1826 bp | TCGGACCG <u>CACGTATCGTGC</u> AGCCCCTTA  |

Table S5. High  $\Delta G$  rho-independent terminators predicted in the genome *Pectobacterium* phage vB\_PatP\_CB1 identified using ARNold and QuikFold.

| Terminator | Coordinates                    | Sequence                              | $\Delta G$<br>kcal/mol |
|------------|--------------------------------|---------------------------------------|------------------------|
| Torf1_1    | 397 - 428                      | GCCTACTCTTCGGAGTAGGCTTATTCTTTTCT      | -17.2                  |
| Torf1_7    | 2,906 - 2,935                  | TAACCCCTTCGGGGGTTATCTTATTTTTTA        | -13.6                  |
| Torf1_20   | 7,127 - 7,158                  | GCCATCCCTTCGGGGATGGCTGTTTTATTGAG      | -19.3                  |
| Torf1_26   | 11,034 - 11,070                | CGGACTCCCTAAGATGGGGAGTCCGTATTTTTTCATA | -19                    |
| Torf1_45   | 25,131 - 25,163                | GCCAGCCCTTCGGGGCTGGTTTTTAATATCAT      | -18.8                  |
| Torf1_47   | 28,088 - 28,113                | GCCCCTTCGGGGGCTTTTTTGAGGCT            | -13.7                  |
| Torf1_51   | 29,497 - 29,525                | AGCCCCTAACGGGGCTTTTTTATTGAGGT         | -12.8                  |
| Torf1_56   | 31,765 - 31,793                | GCCCACCTAGTGTGGGCTTATATTAATCT         | -10.7                  |
| Torf1_57   | 31,751 - 31,782,<br>complement | AGCCCACACTAGGTGGGCTTTTTTATAGCATC      | -11.8                  |
| Torf1_61   | 33,531 - 33,561,<br>complement | GGGAGCCTAATGGCTCCCTTTTTAATCTGGA       | -15.4                  |
| Torf1_72   | 45,051 - 45,078                | GCCCACTTCGGTGGGCTTTTTTATCTAT          | -14.7                  |
| Torf1_76   | 46,958 - 46,987                | GCCCCTCGATTGAGGGGCTTTATTTTTTAG        | -14.5                  |
| Torf1_77   | 46,944 - 46,976,<br>complement | AGCCCCTCAATCGAGGGGCTTTTTATTACGGTA     | -15.4                  |
| Torf1_81   | 62,438 - 62,467,<br>complement | GGGAGCTTAAGGCTCCCTTTTCATTGTGAG        | -11.9                  |
| Torf1_83   | 63,896 - 63,928,<br>complement | GCCGGGGATAATTCCCCGGCTTTTTTATATCTA     | -18.1                  |
| Torf1_87   | 69,766 - 69,796                | CTCCCTCTTCAGAGGGAGcTTTAAACCTGA        | -12.1                  |
| Torf1_88   | 70,620 - 70,649                | GCCCCACTTCGGTGGGGCTTTTTCCGTTAT        | -18                    |
| Torf1_89   | 71,047 - 71,076                | GCCCCCGATTAAGGGGGCTTTTTATTACA         | -14.6                  |

Table S6. High  $\Delta G$  rho-independent terminators predicted in the genome *Pectobacterium* phage vB\_PatP\_CB3 identified using ARNold and QuikFold.

| Terminator | Coordinates                    | Sequence                                  | $\Delta G$<br>kcal/mol |
|------------|--------------------------------|-------------------------------------------|------------------------|
| Torf3_1    | 451 - 482                      | GCCTACTCTTCGGAGTAGGCTTATTCTTTTCT          | -17.2                  |
| Torf3_7    | 2,670 - 2,699                  | TAACCCCTTCGGGGGTTATCTTATTTTTTA            | -13.6                  |
| Torf3_21   | 7,283 - 7,314                  | GCCATCCCTTCGGGGATGGCTGTTTTATTGAG          | -19.3                  |
| Torf3_29   | 11,386 - 11,422                | CGGACTCCCCATCTTAGGGAGTCCGTATTTTTTCAT<br>A | -17.1                  |
| Torf3_57   | 20,329 - 20,357                | GCCAGATTTAATCTGGCTTTTTCTTTTTA             | -9.4                   |
| Torf3_49   | 25,440 - 25,472                | GCCAGCCCTTCGGGGCTGGTTTTTTAATATCAT         | -18.8                  |
| Torf3_51   | 28,397 - 28,422                | GCCCCTTCGGGGGCTTTTTTGAGGCT                | -13.7                  |
| Torf3_55   | 29,806 - 29,834                | AGCCCTAACGGGGCTTTTTTATTGAGGT              | -12.8                  |
| Torf3_60   | 32,074 - 32,102                | GCCACCTAGTGTTGGGCTTATATTAATCT             | -10.7                  |
| Torf3_65   | 33,840 - 33,870,<br>complement | GGGAGCCTAATGGCTCCCTTTTAAATCTGGA           | -15.4                  |
| Torf3_77   | 45,360 - 45,387                | GCCCACTTCGGTGGGCTTTTTTATCTAT              | -14.7                  |
| Torf3_81   | 47,267 - 47,296                | GCCCCTCGATTGAGGGGCTTTATTTTTTAG            | -14.5                  |
| Torf3_82   | 47,253 - 47,285,<br>complement | AGCCCTCAATCGAGGGGCTTTTTATTACGGTA          | -15.4                  |
| Torf3_86   | 62,747 - 62,776,<br>complement | GGGAGCTTAAGGCTCCCTTTTCATTGTGAG            | -11.9                  |
| Torf3_88   | 64,205 - 64,237,<br>complement | GCCGGGGATAATTCCCCGGCTTTTTTATATCTA         | -18.4                  |
| Torf3_92   | 69,948 - 69,978                | CTCCCTCTCAGAGGGAGcTTTAAACCTGA             | -12.1                  |
| Torf3_94   | 70,802 - 70,831                | GCCCCACTTCGGTGGGGCTTTTTCCGTTAT            | -18                    |
| Torf3_95   | 71,229 - 71,258                | GCCCCGATTAAGGGGGCTTTTTTATTACA             | -14.6                  |

Table S7. High  $\Delta G$  rho-independent terminators predicted in the genome *Pectobacterium* phage vB\_PatP\_CB4 identified using ARNold and QuikFold.

| Terminator | Coordinates                    | Sequence                                  | $\Delta G$<br>kcal/mol |
|------------|--------------------------------|-------------------------------------------|------------------------|
| Torf4_1    | 396 - 429                      | GCCTCATCCTTCGGGATGGGGCTATCTCTTTTCT        | -19.6                  |
| Torf4_7    | 2,617 - 2,646                  | TAACCCCTTCGGGGGTTATCTTATTTTTTA            | -13.6                  |
| Torf4_21   | 7,230 - 7,261                  | GCCATCCCTTCGGGGATGGCTGTTTTATTGAG          | -19.3                  |
| Torf4_29   | 11,333 - 11,369                | CGGACTCCCCATCTTAGGGAGTCCGTATTTTTTCAT<br>A | -17.1                  |
| Torf4_45   | 20,116 - 20,144                | GCCAGATTTAATCTGGCTTTTCTTTTAA              | -9.4                   |
| Torf4_48   | 25,226 - 25,258                | GCCAGCCCTTCGGGGCTGGTTTTTTAATATCAT         | -18.8                  |
| Torf4_50   | 28,183 - 28,208                | GCCCCCTTCGGGGGCTTTTTTGAGGCT               | -13.7                  |
| Torf4_54   | 29,592 - 29,620                | AGCCCCTAACGGGGCTTTTTTATTGAGGT             | -12.8                  |
| Torf4_59   | 31,860 - 31,888                | GCCCACCTAGTGTGGGCTTATATTAATCT             | -10.7                  |
| Torf4_64   | 33,826 - 33,656,<br>complement | GGGAGCCTAATGGCTCCCTTTTAAATCTGGA           | -15.4                  |
| Torf4_76   | 45,615 - 45,642                | GCCCACTTCGGTGGGCTTTTTTATCTAT              | -14.7                  |
| Torf4_81   | 47,508 - 47,540,<br>complement | AGCCCCTCAATCGAGGGGCTTTTTATTACGGTA         | -15.4                  |
| Torf4_80   | 47,522 - 47,551                | GCCCCTCGATTGAGGGGCTTTATTTTTTAG            | -14.5                  |
| Torf4_85   | 63,002 - 63,031,<br>complement | GGGAGCTTAAGGCTCCCTTTTCATTGTGAG            | -18.1                  |
| Torf4_91   | 70,203 - 70,233                | CTCCCTCTTCGGAGGGAGcTTTTAAACCTGA           | -15.2                  |
| Torf4_92   | 71,175 - 71,204                | GCCCCACTTCGGTGGGGCTTTTTCCGTTAT            | -18                    |
| Torf4_93   | 71,602 - 71,631                | GCCCCGATTAAGGGGGCTTTTTTATTACA             | -14.6                  |



Table S8. Shared high  $\Delta G$  putative rho-independent terminators among *Pectobacterium* phages CB1, CB3 and CB4

| no. | CB1      | CB3      | CB4      |
|-----|----------|----------|----------|
| 1   | Torf1_01 | Torf3_01 | Torf4_01 |
| 2   | Torf1_07 | Torf3_07 | Torf4_07 |
| 3   | Torf1_20 | Torf3_21 | Torf4_21 |
| 4   | Torf1_26 | Torf3_29 | Torf4_29 |
| 5   | Torf1_45 | Torf3_49 | Torf4_48 |
| 6   | Torf1_47 | Torf3_51 | Torf4_50 |
| 7   | Torf1_51 | Torf3_55 | Torf4_54 |
| 8   | Torf1_56 | Torf3_60 | Torf4_59 |
| 9   | Torf1_61 | Torf3_65 | Torf4_64 |
| 10  | Torf1_72 | Torf3_77 | Torf4_76 |
| 11  | Torf1_76 | Torf3_81 | Torf4_80 |
| 12  | Torf1_77 | Torf3_82 | Torf4_81 |
| 13  | Torf1_81 | Torf3_86 | Torf4_85 |
| 14  | Torf1_87 | Torf3_92 | Torf4_91 |
| 15  | Torf1_88 | Torf3_94 | Torf4_92 |
| 16  | Torf1_89 | Torf3_95 | Torf4_93 |

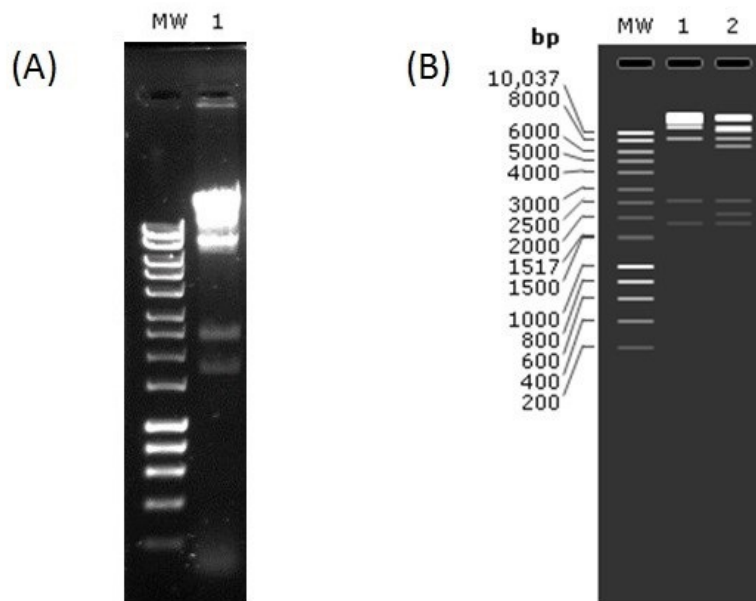

Figure S4. (A) Genomic DNA of *Pectobacterium* phage CB1, which had been digested with restriction enzyme Clal (lane 1), with DNA marker (Hyperladder 1kb, Bioline) (lane MW). (B) *In silico* digest of CB1 redundant genomic DNA with Clal with Dam methylation (lane 2); non-Dam methylation (lane 3); DNA marker (Hyperladder 1kb, Bioline) (lane MW). Gel concentration 1 % w/v agarose. Image B was generated using Snapgene.

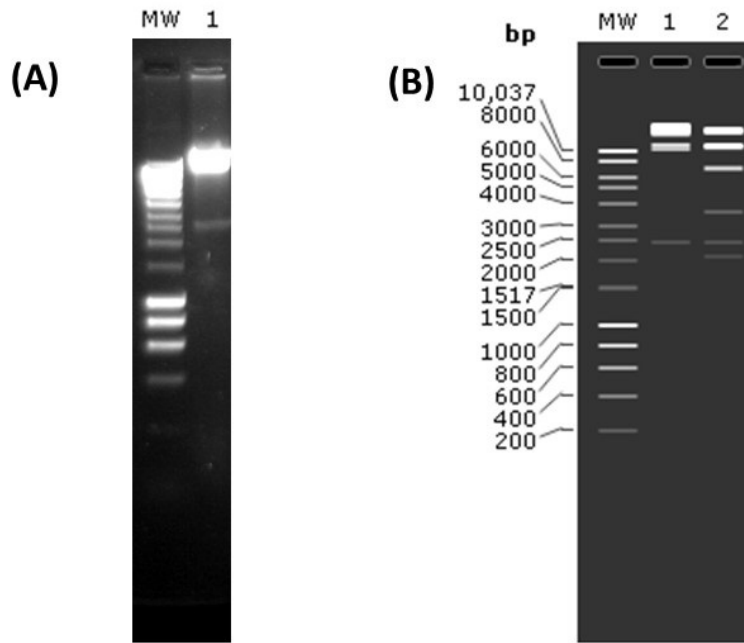

Figure S5. (A) Genomic DNA of *Pectobacterium* phage CB3, which had been digested with restriction enzyme Clal (lane 1), with DNA marker (Hyperladder 1kb, Bioline) (lane MW). (B) *In silico* digest of CB3 redundant genomic DNA with Clal with Dam methylation (lane 2); non-Dam methylation (lane 3); DNA marker (Hyperladder 1kb, Bioline) (lane MW). Gel concentration 1 % w/v agarose. Image B was generated using Snapgene.

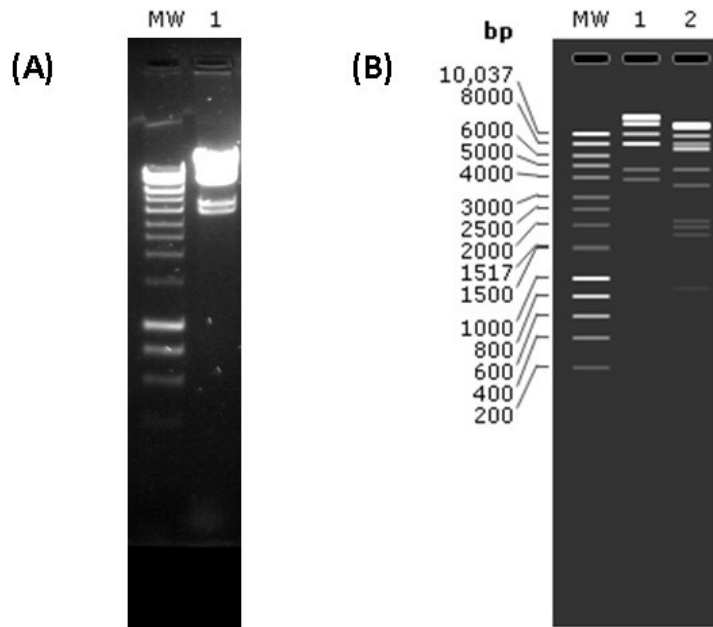

Figure S6. (A) Genomic DNA of *Pectobacterium* phage CB4, which had been digested with restriction enzyme Clal (lane 1), with DNA marker (Hyperladder 1kb, Bioline) (lane MW). (B) *In silico* digest of CB4 redundant genomic DNA with Clal with Dam methylation (lane 2); non-Dam methylation (lane 3); DNA marker (Hyperladder 1kb, Bioline) (lane MW). Gel concentration 1 % w/v agarose. Image B was generated using Snapgene.

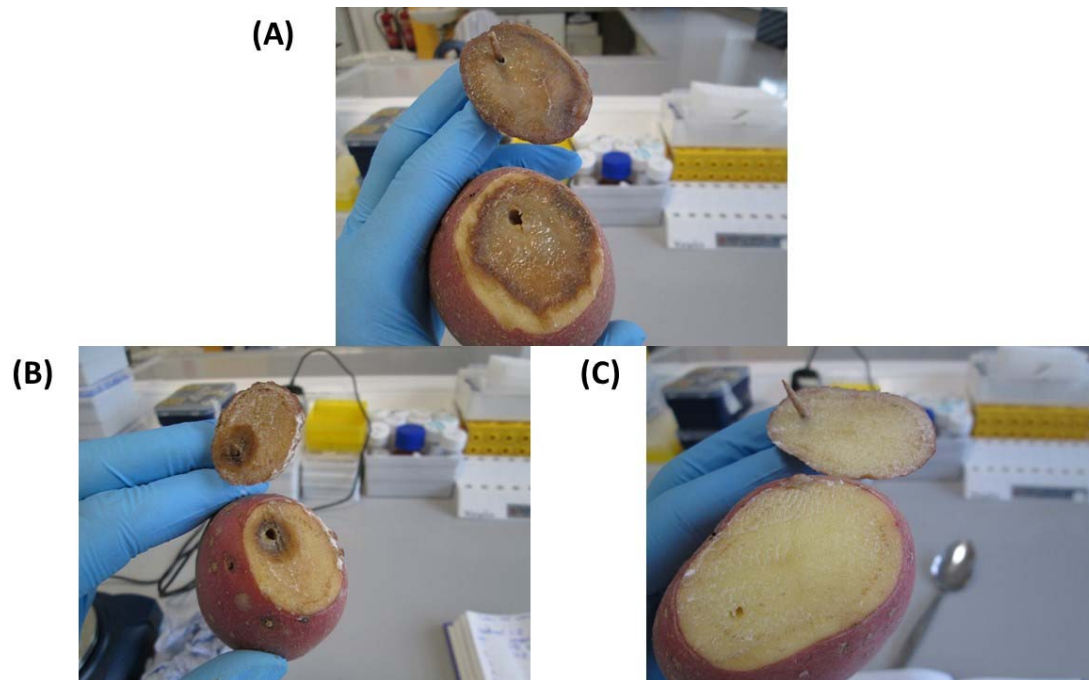

Figure S7. Pictures of the typical observed outcomes for the tuber rot assays. A: tuber treated with bacterial strains DSM 18077 + DSM 30186 and SM buffer. B: tuber treated with bacterial strains DSM 18077 + DSM 30186 and phage mixture (CB1 + CB3 + CB4). C: tuber treated with water and SM buffer.
