# Supplementary material
Source: MDPI journal article supplement (https://www.mdpi.com/1424-8247/11/2/45)
Supplement: s1 [file s1]

Table S1. Bacteria strains used in the Isolation and the testing of host range of *Pectobacterium* phages CB1, CB3 and CB4.

| Bacteria                                                    | strain                   | Isolation source                                  |
|-------------------------------------------------------------|--------------------------|---------------------------------------------------|
| <i>Pectobacterium atrosepticum</i>                          | DSMZ 18077 (type strain) | Potato ( <i>Solanum tuberosum</i> )               |
|                                                             | DSMZ 30184               | Potato ( <i>Solanum tuberosum</i> cv. Bodenkraft) |
|                                                             | DSMZ 30185               | Potato ( <i>Solanum tuberosum</i> )               |
|                                                             | DSMZ 30186               | Potato ( <i>Solanum tuberosum</i> cv. Maritta)    |
| <i>Pectobacterium carotovorum</i> subsp. <i>carotovorum</i> | DSMZ 30168 (type strain) | Potato ( <i>Solanum tuberosum</i> )               |
|                                                             | DSMZ 30169               | <i>Brassica oleracea</i> var. <i>capitata</i>     |
|                                                             | DSMZ 30170               | Potato ( <i>Solanum tuberosum</i> "Maritta")      |
| <i>Dickeya chrysanthemi</i> bv <i>chrysanthemi</i>          | LMG 2804 (type strain)   | <i>Chrysanthemum</i>                              |
| <i>Dickeya dianthicola</i>                                  | PD 482                   | <i>Solanum tuberosum</i> cv. Ostara               |
|                                                             | PD 2174                  | -                                                 |
|                                                             | GBBC 1538                | -                                                 |
| <i>Dickeya solani</i>                                       | sp. PRI 2222             | -                                                 |
|                                                             | LMG 25865                | <i>Solanum tuberosum</i> cv. Première             |
|                                                             | GBBC 1502                | -                                                 |
|                                                             | GBBC 1586                | -                                                 |

Table S2. Genbank details of N4-like phages used in phylograms and Gegenees analysis.

| Phage                                    | Genbank accession number | DNA polymerase | virion RNA polymerase |
|------------------------------------------|--------------------------|----------------|-----------------------|
| <i>Achromobacter</i> phage JWAAlpha      | KF787095.1               | KF787095.1     | YP_009004769.1        |
| <i>Achromobacter</i> phage JWDelta       | KF787094.1               | KF787094.1     | AHC56581.1            |
| <i>Achromobacter</i> phage phiAxp-3      | NC_028908.1              | NC_028908.1    | YP_009208706.1        |
| <i>Acinetobacter</i> phage Presley       | KF669658.1               | KF669658.1     | YP_009007647.1        |
| <i>Dinoroseobacter</i> phage DFL12phi1   | KJ621082.2               | KJ621082.2     | YP_009043702.1        |
| <i>Dinoroseobacter</i> phage vBDshPR2C   | KJ803031.1               | KJ803031.1     | AID16877.1            |
| <i>Enterobacter</i> phage EcP1           | NC_019485.1              | NC_019485.1    | YP_007003173.1        |
| <i>Erwinia</i> phage Ea9-2               | NC_023579.1              | YP_009007430   | YP_009007447.1        |
| <i>Erwinia</i> phage vB_EamP_Gutmeister  | KX098391.1               | ANJ65360.1     | ANJ65375.1            |
| <i>Erwinia</i> phage vB_EamP_Rexella     | KX098390.1               | ANJ65282.1     | ANJ65299.1            |
| <i>Erwinia</i> phage vB_EamP-S6          | NC_019514.1              | NC_019514.1    | YP_007005815.1        |
| <i>Escherichia</i> phage ECBP1           | JX415535.1               | YP_006908814.1 | YP_006908827.1        |
| <i>Escherichia</i> phage N4              | NC_008720.1              | YP_950517.1    | YP_950528.1           |
| <i>Escherichia</i> phage Pollock         | NC_027381.1              | NC_027381.1    | YP_009152160.1        |
| <i>Escherichia</i> phage vB_EcoP_G7C     | HQ259105.1               | YP_004782168.1 | YP_004782180.1        |
| <i>Escherichia</i> phage vB_EcoP_PhaPEC7 | KF562340.1               | YP_009056171.1 | YP_009056186.1        |
| <i>Pseudoalteromonas</i> phage pYD6-A    | JF974296.1               | JF974296.1     | YP_007674286.1        |
| <i>Pseudomonas</i> phage inbricus        | MG018928.1               | ATW58103.1     | ATW58114.1            |
| <i>Pseudomonas</i> phage KPP21           | LC064302.1               | LC064302.1     | YP_009218950.1        |
| <i>Pseudomonas</i> phage LIT1            | FN422399.1               | YP_003358435.1 | YP_003358468.1        |
| <i>Pseudomonas</i> phage LUZ7            | FN422398.1               | FN422398.1     | YP_003358355.1        |
| <i>Pseudomonas</i> phage RWG             | KM411958.1               | AIZ94788.1     | AIZ94822.1            |
| <i>Pseudomonas</i> phage vB_Pae575P-3    | KX171209.1               | ANT44317.1     | ANT44349.1            |
| <i>Pseudomonas</i> phage ZC03            | KU356690.1               | KU356690.1     | AMD43402.1            |
| <i>Pseudomonas</i> phage ZC08            | KU356691.1               | KU356691.1     | AMD43541.1            |
| Roseophage DSS3P2                        | FJ591093.1               | FJ591093.1     | YP_002899070.1        |
| Roseophage EE36P1                        | FJ591094.1               | FJ591094.1     | YP_002898988.1        |
| <i>Salmonella</i> phage FSL SP-058       | NC_021772.1              | NC_021772.1    | YP_008239463.1        |
| <i>Salmonella</i> phage FSL SP-076       | KC139520.1               | KC139520.1     | YP_008240191.1        |
| <i>Sulfitobacter</i> phage phiCB2047-B   | NC_020862                | NC_020862      | YP_007675808.1        |
| <i>Vibrio</i> phage JA-1                 | KC438282.1               | KC438282.1     | YP_008126816.1        |
| <i>Vibrio</i> phage JSF3                 | KY065148.1               | APD18062.1     | APD18049.1            |
| <i>Vibrio</i> phage phi 1                | KP280062.1               | KP280062.1     | YP_009198592.1        |
| <i>Vibrio</i> phage pVa5                 | KX889068.1               | KX889068.1     | APC46019.1            |
| <i>Vibrio</i> phage pVco-5               | KY612839.1               | ARM71084.1     | ARM71100.1            |
| <i>Vibrio</i> phage VBP32                | HQ634196.1               | HQ634196.1     | YP_007676574.1        |
| <i>Vibrio</i> phage VBP47                | HQ634194.1               | HQ634194.1     | YP_007674140.1        |
| <i>Vibrio</i> phage VCO139               | KC438283.1               | KC438283.1     | AGI61882.1            |
